# Supplementary material
Source: Research Square preprint supplement (doi:10.21203/rs.3.rs-8834665/v1)
Supplement: Supplementary file 1 [file 2c00117ab6a9c905be454380.docx]

**Supplementary Information**

Nickel(II) and Zinc(II) Binding to Tau Protein Fragments Containing Histidine and Cysteine

Faareha Mazhar 1,2, Noémi Piskolti 1, Viktória Kovács 1 and Katalin Várnagy 1,*

1 Department of Inorganic and Analytical Chemistry, University of Debrecen, H-4032 Debrecen, Hungary

2 Doctoral School of Chemistry
University of Debrecen
H-4032, Debrecen, Egyetem tér 1, Hungary

***** Correspondence: varnagy.katalin@science.unideb.hu;

**
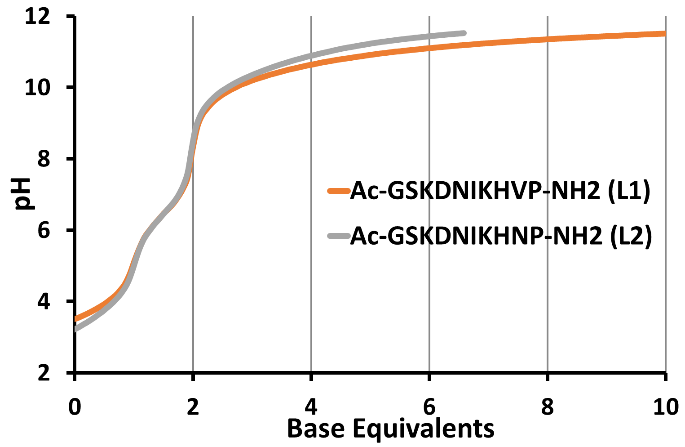

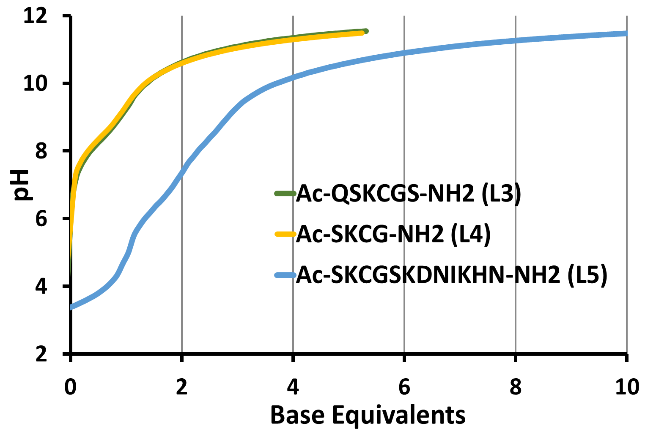
**

**(a) (b)**

**Figure S1.** Titration curves of ligands in function of equivalent of titrant: (cL = 2 mM) L1 and L2 **(a)**, L3, L4, and L5 **(b)**.

**
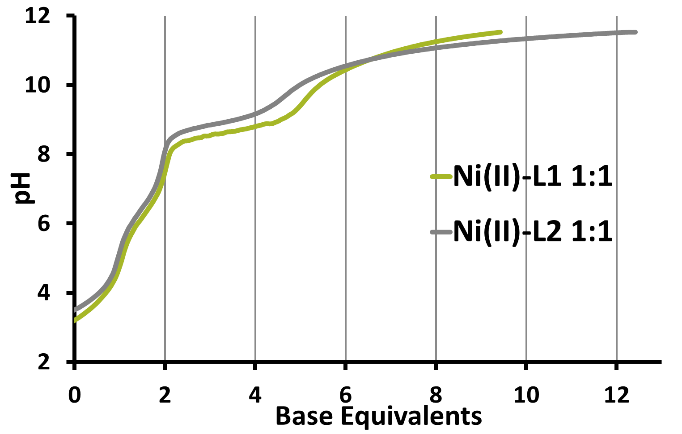

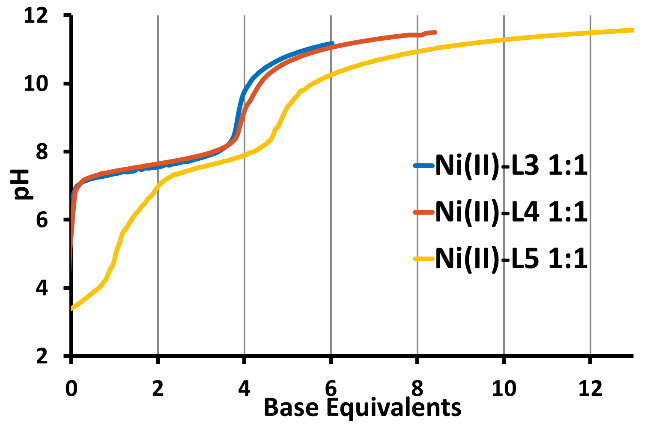
**

**(a) (b)**

**Figure S2.** Titration curves of equimolar Ni(II)-ligands solution in function of equivalent of titrant (cL = 2 mM) L = L1 and L2 **(a)**; L = L3, L4 and L5 **(b)**.

**
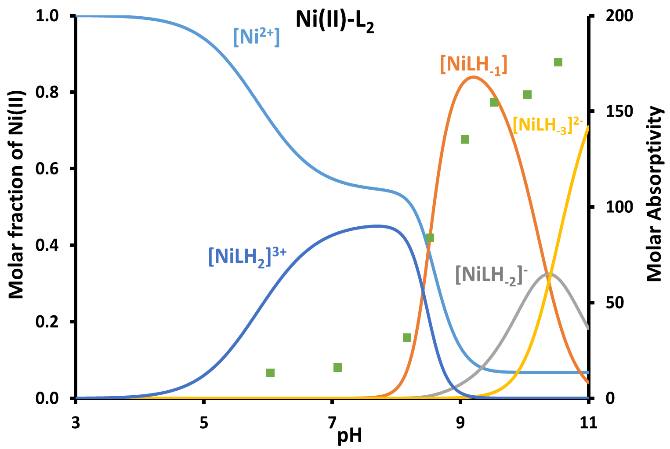

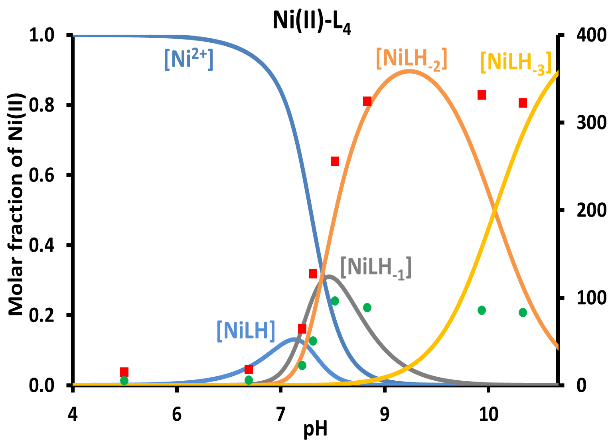
**

**(a) (b)**

**
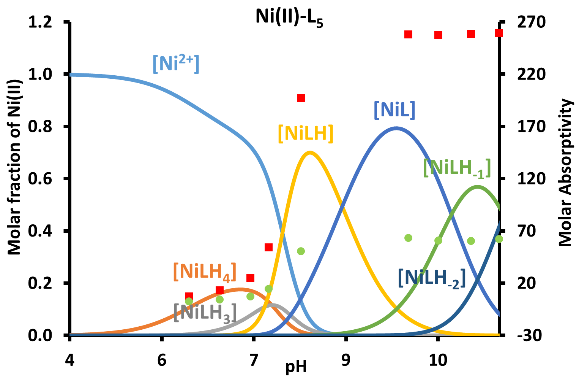
**

**(e)**

**Figure S3.** The distribution curves of the Ni(II) complexes formed at equimolar concentration ratio (c(L) = 2 mM) are plotted together with the change of absorption maxima at: L2 at 445 nm (●) **(a)**, L3 at 446 nm (●) and 540 nm (●) **(b)** and L5 at 448 nm (●) and 543 nm (●) **(c)**.
